# Supplementary material
Source: PubMed Central journal article supplement (PMC8898397)
Supplement: NIHMS1780205-supplement-Li_et_al_SI.pdf [file NIHMS1780205-supplement-Li_et_al_SI.pdf]

1 **Supporting Information**

2

3 **Thiol-cleavable Biotin for Chemical and Enzymatic Biotinylation and its**  
4 **Application to Mitochondrial TurboID Proteomics**

5

6 Haorong Li<sup>1\*</sup>, Ashley M. Frankenfield<sup>1\*</sup>, Ryan Houston<sup>2</sup>, Shiori Sekine<sup>2</sup>, and Ling Hao<sup>1‡</sup>

7 <sup>1</sup>Department of Chemistry, The George Washington University, Science and Engineering Hall,  
8 800 22<sup>nd</sup> St., NW, Washington, DC, 20052, USA

9 <sup>2</sup> Aging Institute, Division of Cardiology, Department of Medicine, University of Pittsburgh,  
10 Bridgeside Point I, 100 Technology Drive, Pittsburgh, PA 15219, USA

11

12 \*Co-first author

13

14 ‡ Corresponding author

15 Ling Hao

16 Assistant Professor of Chemistry

17 Tel.: +1 (202) 994-4492

18 E-mail: [linghao@gwu.edu](mailto:linghao@gwu.edu)

19      **TABLE OF CONTENTS**

20

21      • **Figure S1.** Example LC-MS chromatograms (A) and MS/MS spectra of peptide fragmentation  
22            (B) for SS-biotin labeled, biotin-labeled, and unlabeled peptide (PNDTQWITKPVHK) from  
23            ribosomal protein L15 (RPL15) in human cell lysate.

24      • **Figure S2.** Histogram distribution of precursor masses (M+H) of non-labeled, biotin-labeled,  
25            and SS-biotin-labeled peptides from human cell lysate samples.

26      • **Figure S3.** Comparison of the protein digestion efficiency using Trypsin, LysC, and  
27            Trypsin/Lys-C mix for SS-biotin labeled human protein lysate.

28      • **Table S1:** Thiol cleavable SS-biotin modified peptide sequences in labeled human cell lysate.

29      • **Table S2:** Protein IDs and quantification in SS-biotin labeled vs. biotin labeled vs. unlabeled  
30            human cell lysate.

31      • **Table S3:** Average percolator *q*-values of modified peptides at various amino acid residues.

32      • **Table S4:** Protein IDs and quantification in STOML2-TurboID vs. control.

33      • **Table S5:** SS-biotinylated peptides in STOML2-TurboID Proteomics.

34      • **Table S6:** Leftover beads digestion showing that the elution was complete.

35

36

37

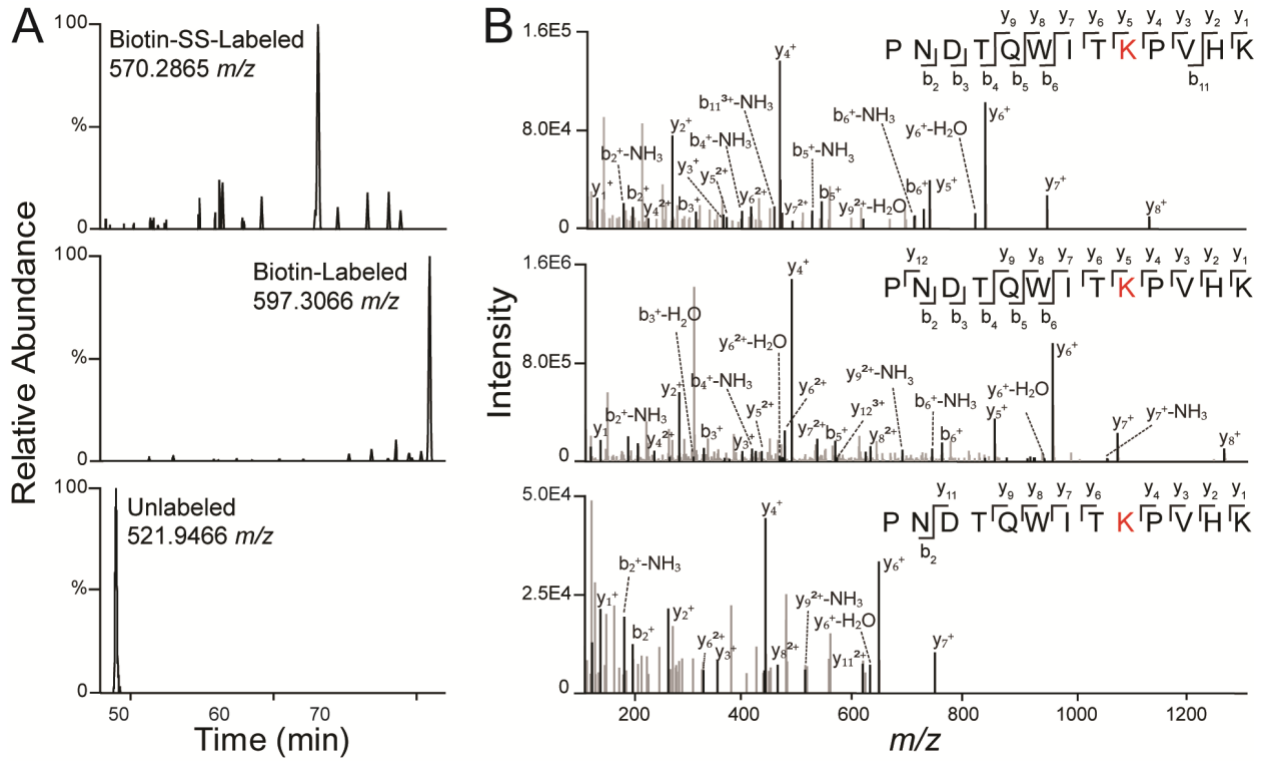

38

39 **Figure S1.** Example LC-MS chromatograms (A) and MS/MS spectra of peptide fragmentation (B)

40 for SS-biotin labeled, biotin-labeled, and unlabeled peptide (PNDTQWITKPVHK) from

41 ribosomal protein L15 (RPL15) in human cell lysate.

42

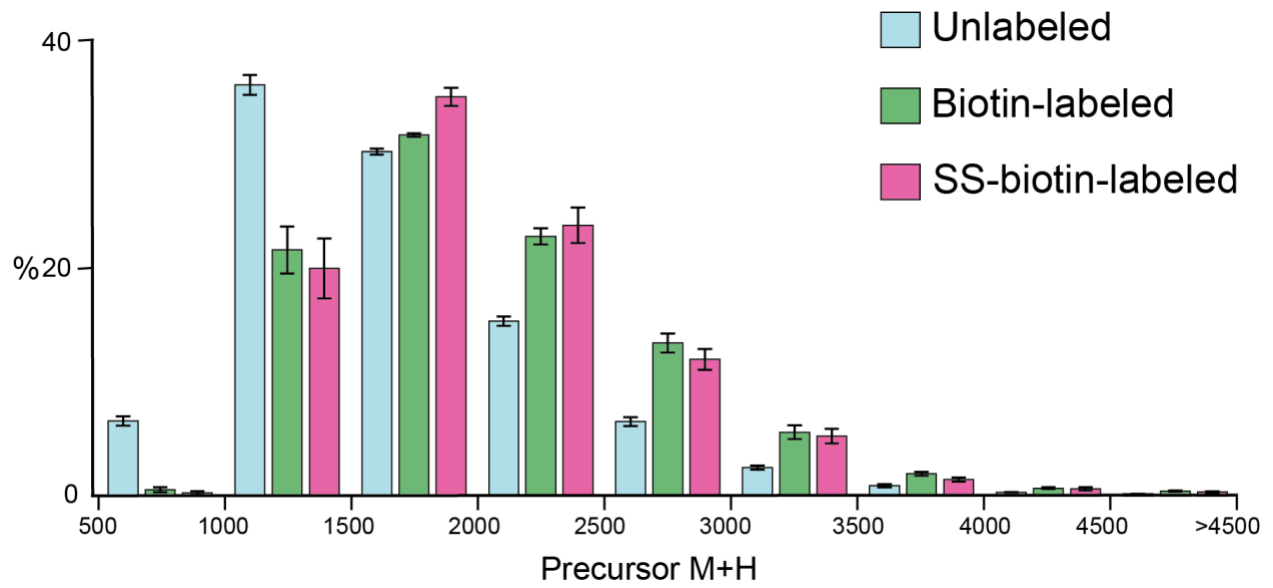

43

44 **Figure S2.** Histogram distribution of precursor masses (M+H) of non-labeled, biotin-labeled, and

45 SS-biotin-labeled peptides from human cell lysate samples.

46

47

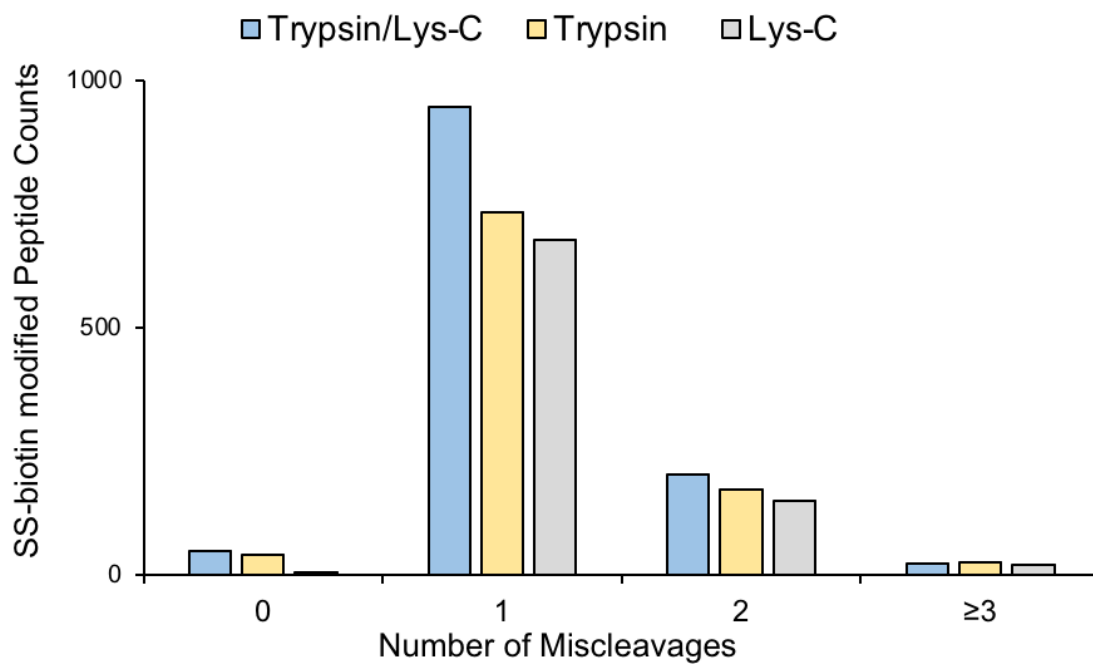

48

49 **Figure S3.** Comparison of the protein digestion efficiency using Trypsin, LysC, and Trypsin/Lys-  
50 C mix for SS-biotin labeled human protein lysate.

51
